# Supplementary material for: TRIM11, a direct target of miR-24-3p, promotes cell proliferation and inhibits apoptosis in colon cancer
Source: PubMed Central journal article supplement (PMC5349951; doi:10.18632/oncotarget.13550), 2016-11-24
Supplement: oncotarget-07-86755-s001.pdf [file oncotarget-07-86755-s001.pdf]

## TRIM11, a direct target of miR-24-3p, promotes cell proliferation and inhibits apoptosis in colon cancer

### SUPPLEMENTARY FIGURE

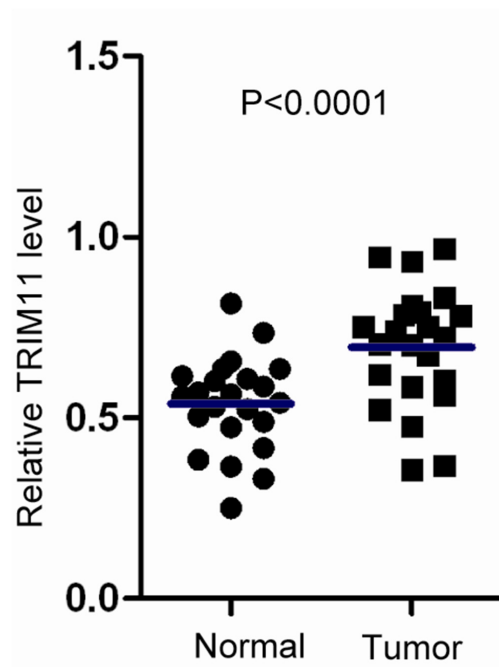

**Supplementary Figure S1: Quantitative and statistical analysis of TRIM11 expression in clinical CC samples in tumor and paired normal tissues.** The blue bars stand for the mean value. The p-value was calculated according to the raw data using Student's t-test ( $P < 0.0001$ ).
